# Supplementary material
Source: PubMed Central journal article supplement (PMC4030604)
Supplement: NIHMS481119-supplement-01.pdf [file NIHMS481119-supplement-01.pdf]

| Supplemental Table 1. Smallest significant regions with copy number changes in malignant mesothelioma cell lines                        |                   |               |                        |                           |                                       |                      |                                        |
|-----------------------------------------------------------------------------------------------------------------------------------------|-------------------|---------------|------------------------|---------------------------|---------------------------------------|----------------------|----------------------------------------|
| Region <sup>a</sup>                                                                                                                     | Cytoband location | Region Length | CN change <sup>b</sup> | No. of genes <sup>c</sup> | Percentage of cell lines <sup>d</sup> | p-value <sup>e</sup> | Percentage of CNV Overlap <sup>f</sup> |
| chr9:21,973,222-22,354,257                                                                                                              | 9p21.3            | 381,035       | Loss                   | 4                         | 100                                   | 0                    | 0                                      |
| chr13:28,852,665-28,941,613                                                                                                             | 13q12.2 - q12.3   | 88,948        | Loss                   | 2                         | 82                                    | 0.003                | 83                                     |
| chr16:6,770,326-6,961,633                                                                                                               | 16p13.3           | 191,307       | Loss                   | 1 <sup>h</sup>            | 76                                    | 0                    | 0                                      |
| chr1:4,507,843-5,027,751                                                                                                                | 1p36.32           | 519,908       | Loss                   | 2                         | 71                                    | 0.028                | 0                                      |
| chr1:5,847,675-12,907,136                                                                                                               | 1p36.31 - p36.21  | 7,059,461     | Loss                   | 99; 5 <sup>B</sup>        | 71                                    | 0.028                | 6                                      |
| chr6:32,469,084-32,538,937                                                                                                              | 6p21.32           | 69,853        | Loss                   | 3                         | 47                                    | 0                    | 100                                    |
| chr9:71,234,232-72,423,412                                                                                                              | 9q21.11 - q21.12  | 1,189,180     | Loss                   | 10                        | 47                                    | 0                    | 7                                      |
| chr16:7,249,315-7,284,367                                                                                                               | 16p13.3           | 35,052        | Loss                   | 1 <sup>h</sup>            | 47                                    | 0.001                | 58                                     |
| chr16:6,245,937-6,299,769                                                                                                               | 16p13.3           | 53,832        | Loss                   | 1 <sup>h</sup>            | 41                                    | 0.014                | 0                                      |
| chr1:157,398,349-157,805,740                                                                                                            | 1q23.1            | 407,391       | Gain                   | 7                         | 65                                    | 0                    | 2                                      |
| chr1:157,883,449-158,092,535                                                                                                            | 1q23.1            | 209,086       | Gain                   | 3                         | 65                                    | 0                    | 0                                      |
| chr5:784,423-808,109                                                                                                                    | 5p15.33           | 23,686        | Gain                   | 1                         | 65                                    | 0.004                | 100                                    |
| chr17:37,876,495-38,184,266                                                                                                             | 17q12 - q21.1     | 307,771       | Gain                   | 13; 1 <sup>B</sup>        | 65                                    | 0.032                | 0                                      |
| chr17:40,863,774-41,005,303                                                                                                             | 17q21.2 - q21.31  | 141,529       | Gain                   | 12                        | 65                                    | 0.032                | 0                                      |
| chr17:44,221,384-44,418,461                                                                                                             | 17q21.31          | 197,077       | Gain                   | 4                         | 65                                    | 0.032                | 100                                    |
| chr8:145,637,777-145,733,477                                                                                                            | 8q24.3            | 95,700        | Gain                   | 10                        | 59                                    | 0                    | 3                                      |
| chr20:60,953,791-61,286,207                                                                                                             | 20q13.33          | 332,416       | Gain                   | 8; 2 <sup>B</sup>         | 59                                    | 0.027                | 15                                     |
| chr3:162,486,527-162,637,386                                                                                                            | 3q26.1            | 150,859       | Gain                   | 1                         | 53                                    | 0                    | 76                                     |
| chr8:39,229,932-39,398,576                                                                                                              | 8p11.22           | 168,644       | Gain                   | 3                         | 53                                    | 0                    | 100                                    |
| chr7:72,490,276-73,992,274                                                                                                              | 7q11.23           | 1,501,998     | Gain                   | 40; 2 <sup>B</sup>        | 47                                    | 0.002                | 3                                      |
| chr7:99,867,651-100,068,777                                                                                                             | 7q22.1            | 201,126       | Gain                   | 10                        | 47                                    | 0.002                | 20                                     |
| chr19:0-616,511                                                                                                                         | 19p13.3           | 616,511       | Gain                   | 18; 1 <sup>B</sup>        | 47                                    | 0.002                | 22                                     |
| chr6:31,552,127-31,574,180                                                                                                              | 6p21.33           | 22,053        | Gain                   | 1                         | 41                                    | 0                    | 0                                      |
| chr1:44,289,519-44,550,931                                                                                                              | 1p34.1            | 261,412       | Gain                   | 9                         | 35                                    | 0.043                | 2                                      |
| chr3:195,425,989-195,467,168                                                                                                            | 3q29              | 41,179        | Gain                   | 3; 1 <sup>B</sup>         | 35                                    | 0.002                | 100                                    |
| chr16:71,114,287-71,204,647                                                                                                             | 16q22.2           | 90,360        | Gain                   | 1                         | 35                                    | 0.001                | 0                                      |
|                                                                                                                                         |                   |               |                        | Total:                    |                                       |                      |                                        |
|                                                                                                                                         |                   |               |                        | 265 genes                 |                                       |                      |                                        |
|                                                                                                                                         |                   |               |                        | and 12 miRNAs             |                                       |                      |                                        |
| <sup>a</sup> Smallest significant regions, by STAC (see materials and methods) with the highest frequency above the % of cut-off line.  |                   |               |                        |                           |                                       |                      |                                        |
| Cut-off line =0 ( no minimal number of cell lines required).                                                                            |                   |               |                        |                           |                                       |                      |                                        |
| <sup>b</sup> Copy number change.                                                                                                        |                   |               |                        |                           |                                       |                      |                                        |
| <sup>c</sup> For gene list please see Supplemental Table 2.                                                                             |                   |               |                        |                           |                                       |                      |                                        |
| <sup>d</sup> Percentage of the 17 malignant mesothelioma cell lines showing the copy number change.                                     |                   |               |                        |                           |                                       |                      |                                        |
| <sup>e</sup> p-value less than or equal to 0.05. FASST segmentation, significant threshold 0.0001.                                      |                   |               |                        |                           |                                       |                      |                                        |
| <sup>f</sup> Copy number variation according to the Database of Genomic Variants (DGV) (Toronto), most stringent DGV from Nexus CN 6.0. |                   |               |                        |                           |                                       |                      |                                        |
| <sup>B</sup> Gene; miRNA. For miRNA list please see Supplemental Table 2                                                                |                   |               |                        |                           |                                       |                      |                                        |
| <sup>h</sup> These 3 areas target the same gene, <i>RBFOX1/A2BP1</i> .                                                                  |                   |               |                        |                           |                                       |                      |                                        |
