# Supplementary material
Source: PubMed Central journal article supplement (PMC4030604)
Supplement: NIHMS481119-supplement-02.pdf [file NIHMS481119-supplement-02.pdf]

|                      |   |             |             |                              |           |                 |      |        |       |        |  |  |
|----------------------|---|-------------|-------------|------------------------------|-----------|-----------------|------|--------|-------|--------|--|--|
| <i>C1orf127</i>      | 1 | 11,006,529  | 11,042,094  |                              |           |                 |      |        |       |        |  |  |
| <i>TARDBP</i>        | 1 | 11,072,678  | 11,085,549  |                              |           |                 |      |        |       |        |  |  |
| <i>MASP2</i>         | 1 | 11,086,579  | 11,107,296  |                              |           |                 |      |        |       |        |  |  |
| <i>SRM</i>           | 1 | 11,114,648  | 11,120,091  |                              |           |                 |      |        |       |        |  |  |
| <i>EXOSC10</i>       | 1 | 11,126,675  | 11,159,938  |                              |           |                 |      |        |       |        |  |  |
| <i>MTOR</i>          | 1 | 11,166,588  | 11,191,615  |                              |           |                 |      |        |       |        |  |  |
| <i>MTOR</i>          | 1 | 11,166,587  | 11,322,608  |                              |           |                 |      |        |       |        |  |  |
| <i>ANGPTL7</i>       | 1 | 11,249,397  | 11,256,038  |                              |           |                 |      |        |       |        |  |  |
| <i>UBIAD1</i>        | 1 | 11,333,254  | 11,348,491  |                              |           |                 |      |        |       |        |  |  |
| <i>PTCHD2</i>        | 1 | 11,539,294  | 11,541,938  |                              |           |                 |      |        |       |        |  |  |
| <i>PTCHD2</i>        | 1 | 11,539,294  | 11,597,640  |                              |           |                 |      |        |       |        |  |  |
| <i>FBXO2</i>         | 1 | 11,708,417  | 11,714,888  |                              |           |                 |      |        |       |        |  |  |
| <i>FBXO44</i>        | 1 | 11,714,431  | 11,723,384  |                              |           |                 |      |        |       |        |  |  |
| <i>FBXO6</i>         | 1 | 11,724,149  | 11,734,409  |                              |           |                 |      |        |       |        |  |  |
| <i>MAD2L2</i>        | 1 | 11,734,536  | 11,751,678  |                              |           |                 |      |        |       |        |  |  |
| <i>C1orf187</i>      | 1 | 11,751,780  | 11,780,336  |                              |           |                 |      |        |       |        |  |  |
| <i>AK125437</i>      | 1 | 11,782,186  | 11,785,914  |                              |           |                 |      |        |       |        |  |  |
| <i>AGTRAP</i>        | 1 | 11,796,141  | 11,810,828  |                              |           |                 |      |        |       |        |  |  |
| <i>C1orf167</i>      | 1 | 11,824,461  | 11,826,573  |                              |           |                 |      |        |       |        |  |  |
| <i>C1orf167</i>      | 1 | 11,832,138  | 11,849,641  |                              |           |                 |      |        |       |        |  |  |
| <i>MTHFR</i>         | 1 | 11,845,786  | 11,866,160  |                              |           |                 |      |        |       |        |  |  |
| <i>CLCN6</i>         | 1 | 11,866,206  | 11,903,201  |                              |           |                 |      |        |       |        |  |  |
| <i>NPPA-AS1</i>      | 1 | 11,900,375  | 11,907,673  |                              |           |                 |      |        |       |        |  |  |
| <i>NPPA-AS1</i>      | 1 | 11,900,375  | 11,907,674  |                              |           |                 |      |        |       |        |  |  |
| <i>NPPA-AS1</i>      | 1 | 11,900,375  | 11,907,674  |                              |           |                 |      |        |       |        |  |  |
| <i>NPPA-AS1</i>      | 1 | 11,900,375  | 11,907,674  |                              |           |                 |      |        |       |        |  |  |
| <i>NPPA-AS1</i>      | 1 | 11,900,375  | 11,907,674  |                              |           |                 |      |        |       |        |  |  |
| <i>NPPA-AS1</i>      | 1 | 11,900,375  | 11,907,674  |                              |           |                 |      |        |       |        |  |  |
| <i>NPPA</i>          | 1 | 11,905,766  | 11,907,840  |                              |           |                 |      |        |       |        |  |  |
| <i>NPPB</i>          | 1 | 11,917,520  | 11,918,992  |                              |           |                 |      |        |       |        |  |  |
| <i>KIAA2013</i>      | 1 | 11,979,644  | 11,986,485  |                              |           |                 |      |        |       |        |  |  |
| <i>PLOD1</i>         | 1 | 11,994,723  | 12,035,599  |                              |           |                 |      |        |       |        |  |  |
| <i>MFN2</i>          | 1 | 12,040,237  | 12,073,572  |                              |           |                 |      |        |       |        |  |  |
| <i>MHIP</i>          | 1 | 12,079,511  | 12,092,106  |                              |           |                 |      |        |       |        |  |  |
| <i>TNFRSF8</i>       | 1 | 12,123,433  | 12,204,264  |                              |           |                 |      |        |       |        |  |  |
| <i>TNFRSF1B</i>      | 1 | 12,227,059  | 12,269,277  |                              |           |                 |      |        |       |        |  |  |
| <i>VPS13D</i>        | 1 | 12,371,510  | 12,398,045  |                              |           |                 |      |        |       |        |  |  |
| <i>VPS13D</i>        | 1 | 12,290,112  | 12,572,098  |                              |           |                 |      |        |       |        |  |  |
| <i>VPS13D</i>        | 1 | 12,427,724  | 12,572,096  |                              |           |                 |      |        |       |        |  |  |
| <i>SNORA59A</i>      | 1 | 12,567,299  | 12,567,451  |                              |           |                 |      |        |       |        |  |  |
| <i>SNORA59B</i>      | 1 | 12,567,299  | 12,567,451  |                              |           |                 |      |        |       |        |  |  |
| <i>DHRS3</i>         | 1 | 12,627,938  | 12,677,820  |                              |           |                 |      |        |       |        |  |  |
| <i>AADA4L4</i>       | 1 | 12,704,565  | 12,727,097  |                              |           |                 |      |        |       |        |  |  |
| <i>AADA4L3</i>       | 1 | 12,776,117  | 12,788,726  |                              |           |                 |      |        |       |        |  |  |
| <i>C1orf158</i>      | 1 | 12,806,162  | 12,821,102  |                              |           |                 |      |        |       |        |  |  |
| <i>PRAMEF12</i>      | 1 | 12,834,983  | 12,838,048  |                              |           |                 |      |        |       |        |  |  |
| <i>PRAMEF1</i>       | 1 | 12,851,545  | 12,856,777  |                              |           |                 |      |        |       |        |  |  |
| <i>PRAMEF11</i>      | 1 | 12,884,467  | 12,891,264  |                              |           |                 |      |        |       |        |  |  |
| <i>MIR4689</i>       | 1 | 5,922,732   | 5,922,801   | chr1:5,847,675-12,907,136    | 7,059,461 | p36.31 - p36.21 | Loss | 70.588 | 0.027 | 6.31   |  |  |
| <i>MIR4252</i>       | 1 | 6,489,894   | 6,489,956   | (5 miRNAs)                   |           |                 |      |        |       |        |  |  |
| <i>MIR34A</i>        | 1 | 9,211,727   | 9,211,836   |                              |           |                 |      |        |       |        |  |  |
| <i>EF609116</i>      | 1 | 9,208,346   | 9,242,451   |                              |           |                 |      |        |       |        |  |  |
| <i>MIR1273D</i>      | 1 | 10,287,776  | 10,287,861  |                              |           |                 |      |        |       |        |  |  |
| <i>MIR4632</i>       | 1 | 12,251,762  | 12,251,839  |                              |           |                 |      |        |       |        |  |  |
| <i>ST3GAL3</i>       | 1 | 44,171,494  | 44,396,830  | chr1:44,289,519-44,550,931   | 261,412   | p34.1           | Gain | 35.294 | 0.043 | 1.66   |  |  |
| <i>ST3GAL3</i>       | 1 | 44,173,217  | 44,396,831  | (9 genes)                    |           |                 |      |        |       |        |  |  |
| <i>ARTN</i>          | 1 | 44,398,991  | 44,402,912  |                              |           |                 |      |        |       |        |  |  |
| <i>IPO13</i>         | 1 | 44,412,477  | 44,433,694  |                              |           |                 |      |        |       |        |  |  |
| <i>DPH2</i>          | 1 | 44,435,652  | 44,439,044  |                              |           |                 |      |        |       |        |  |  |
| <i>ATP6V0B</i>       | 1 | 44,440,601  | 44,443,972  |                              |           |                 |      |        |       |        |  |  |
| <i>B4GALT2</i>       | 1 | 44,444,865  | 44,456,840  |                              |           |                 |      |        |       |        |  |  |
| <i>CCDC24</i>        | 1 | 44,457,279  | 44,462,198  |                              |           |                 |      |        |       |        |  |  |
| <i>SLC6A9</i>        | 1 | 44,457,171  | 44,497,134  |                              |           |                 |      |        |       |        |  |  |
| <i>KLF17</i>         | 1 | 44,514,029  | 44,600,809  |                              |           |                 |      |        |       |        |  |  |
| <i>FCRL5</i>         | 1 | 157,483,166 | 157,522,310 | chr1:157,398,349-157,805,740 | 407,391   | q23.1           | Gain | 64.706 | 0     | 1.64   |  |  |
| <i>FCRL4</i>         | 1 | 157,543,538 | 157,567,870 | (7 genes)                    |           |                 |      |        |       |        |  |  |
| <i>FCRL4</i>         | 1 | 157,543,539 | 157,567,870 |                              |           |                 |      |        |       |        |  |  |
| <i>FCRL3</i>         | 1 | 157,646,277 | 157,670,647 |                              |           |                 |      |        |       |        |  |  |
| <i>FCRL3</i>         | 1 | 157,646,277 | 157,670,775 |                              |           |                 |      |        |       |        |  |  |
| <i>FCRL2</i>         | 1 | 157,715,522 | 157,746,922 |                              |           |                 |      |        |       |        |  |  |
| <i>FCRL2</i>         | 1 | 157,715,522 | 157,746,922 |                              |           |                 |      |        |       |        |  |  |
| <i>FCRL1</i>         | 1 | 157,764,193 | 157,789,940 |                              |           |                 |      |        |       |        |  |  |
| <i>DKFZp667D0116</i> | 1 | 157,764,195 | 157,789,940 |                              |           |                 |      |        |       |        |  |  |
| <i>CD5L</i>          | 1 | 157,800,703 | 157,811,634 |                              |           |                 |      |        |       |        |  |  |
| <i>AK057438</i>      | 1 | 157,895,763 | 157,918,861 | chr1:157,883,449-158,092,535 | 209,086   | q23.1           | Gain | 64.706 | 0     | 0.00   |  |  |
| <i>KIRREL</i>        | 1 | 157,963,062 | 158,065,844 | (3 genes)                    |           |                 |      |        |       |        |  |  |
| <i>hCG_1995134</i>   | 1 | 158,066,315 | 158,069,836 |                              |           |                 |      |        |       |        |  |  |
| <i>BC073807</i>      | 3 | 162,442,526 | 162,949,934 | chr3:162,486,527-162,637,386 | 150,859   | q26.1           | Gain | 52.941 | 0     | 75.94  |  |  |
| <i>BC144457</i>      | 3 | 195,426,821 | 195,435,676 | chr3:195,425,989-195,467,168 | 41,179    | q29             | Gain | 35.294 | 0.002 | 100.00 |  |  |

|              |   |             |             |                                       |           |        |      |        |       |        |  |  |
|--------------|---|-------------|-------------|---------------------------------------|-----------|--------|------|--------|-------|--------|--|--|
| AK128346     | 3 | 195,426,821 | 195,438,745 | (3 genes)                             |           |        |      |        |       |        |  |  |
| MUC20        | 3 | 195,452,111 | 195,453,443 |                                       |           |        |      |        |       |        |  |  |
| MUC20        | 3 | 195,447,752 | 195,464,540 |                                       |           |        |      |        |       |        |  |  |
| MIRS70       | 3 | 195,426,272 | 195,426,368 | chr3:195,425,989-195,467,168 (1 gene) | 41,179    | q29    | Gain | 35.294 | 0.001 | 100.00 |  |  |
| ZDHH11       | 5 | 795,719     | 851,101     | chr5:784,423-808,109 (1 gene)         | 23,686    | p15.33 | Gain | 64.706 | 0.004 | 100.00 |  |  |
| LST1         | 6 | 31,553,955  | 31,556,686  | chr6:31,552,127-31,574,180 (1 gene)   | 22,053    | p21.33 | Gain | 41.176 | 0     | 0.00   |  |  |
| HLA-DRB1     | 6 | 32,485,162  | 32,552,155  | chr6:32,469,084-32,538,937            | 69,853    | p21.32 | Loss | 47.059 | 0     | 100.00 |  |  |
| HLA-DRB5     | 6 | 32,485,153  | 32,557,562  | (3 genes)                             |           |        |      |        |       |        |  |  |
| HLA-DRB6     | 6 | 32,520,489  | 32,527,779  |                                       |           |        |      |        |       |        |  |  |
| DQ586658     | 7 | 72,491,730  | 72,491,759  | chr7:72,490,276-73,992,274            | 1,501,998 | q11.23 | Gain | 47.059 | 0.002 | 3.33   |  |  |
| SPDYE8P      | 7 | 72,490,259  | 72,500,309  | (40 genes)                            |           |        |      |        |       |        |  |  |
| SPDYE3       | 7 | 72,490,260  | 72,500,309  |                                       |           |        |      |        |       |        |  |  |
| PMS2L2       | 7 | 72,476,679  | 72,514,966  |                                       |           |        |      |        |       |        |  |  |
| LOC389527    | 7 | 72,476,665  | 72,515,551  |                                       |           |        |      |        |       |        |  |  |
| PMS2L2       | 7 | 72,476,665  | 72,555,749  |                                       |           |        |      |        |       |        |  |  |
| SPDYE8P      | 7 | 72,518,503  | 72,524,466  |                                       |           |        |      |        |       |        |  |  |
| SPDYE8P      | 7 | 72,518,503  | 72,524,466  |                                       |           |        |      |        |       |        |  |  |
| GTF2IP1      | 7 | 72,569,011  | 72,621,336  |                                       |           |        |      |        |       |        |  |  |
| LOC100093631 | 7 | 72,569,011  | 72,621,336  |                                       |           |        |      |        |       |        |  |  |
| FKBP6        | 7 | 72,440,191  | 72,772,641  |                                       |           |        |      |        |       |        |  |  |
| NCF1         | 7 | 72,634,673  | 72,648,752  |                                       |           |        |      |        |       |        |  |  |
| NCF1B        | 7 | 72,634,673  | 72,649,979  |                                       |           |        |      |        |       |        |  |  |
| GTF2IRD2P1   | 7 | 72,656,901  | 72,685,658  |                                       |           |        |      |        |       |        |  |  |
| GTF2IRD2B    | 7 | 72,656,901  | 72,685,658  |                                       |           |        |      |        |       |        |  |  |
| GTF2IRD2     | 7 | 72,680,055  | 72,683,403  |                                       |           |        |      |        |       |        |  |  |
| BCO18166     | 7 | 72,693,843  | 72,698,885  |                                       |           |        |      |        |       |        |  |  |
| AK127026     | 7 | 72,712,965  | 72,716,800  |                                       |           |        |      |        |       |        |  |  |
| NSUN5        | 7 | 72,716,513  | 72,722,864  |                                       |           |        |      |        |       |        |  |  |
| TRIM50       | 7 | 72,726,534  | 72,742,085  |                                       |           |        |      |        |       |        |  |  |
| FKBP36       | 7 | 72,742,299  | 72,755,381  |                                       |           |        |      |        |       |        |  |  |
| FZD9         | 7 | 72,848,108  | 72,850,450  |                                       |           |        |      |        |       |        |  |  |
| BAZ1B        | 7 | 72,854,727  | 72,936,615  |                                       |           |        |      |        |       |        |  |  |
| BCL7B        | 7 | 72,950,682  | 72,972,065  |                                       |           |        |      |        |       |        |  |  |
| TBL2         | 7 | 72,983,276  | 72,993,013  |                                       |           |        |      |        |       |        |  |  |
| MLXIPL       | 7 | 73,007,523  | 73,038,870  |                                       |           |        |      |        |       |        |  |  |
| MLXIPL       | 7 | 73,007,523  | 73,038,870  |                                       |           |        |      |        |       |        |  |  |
| VPS37D       | 7 | 73,082,173  | 73,086,440  |                                       |           |        |      |        |       |        |  |  |
| DNAJC30      | 7 | 73,095,247  | 73,097,781  |                                       |           |        |      |        |       |        |  |  |
| WBSCR22      | 7 | 73,097,897  | 73,119,491  |                                       |           |        |      |        |       |        |  |  |
| STX1A        | 7 | 73,113,534  | 73,134,017  |                                       |           |        |      |        |       |        |  |  |
| ABHD11-AS1   | 7 | 73,149,398  | 73,150,330  |                                       |           |        |      |        |       |        |  |  |
| ABHD11-AS1   | 7 | 73,149,398  | 73,150,330  |                                       |           |        |      |        |       |        |  |  |
| ABHD11       | 7 | 73,150,424  | 73,153,190  |                                       |           |        |      |        |       |        |  |  |
| CLDN3        | 7 | 73,183,326  | 73,184,600  |                                       |           |        |      |        |       |        |  |  |
| CLDN4        | 7 | 73,242,073  | 73,247,014  |                                       |           |        |      |        |       |        |  |  |
| CLDN4        | 7 | 73,245,192  | 73,247,015  |                                       |           |        |      |        |       |        |  |  |
| WBSCR27      | 7 | 73,248,920  | 73,256,855  |                                       |           |        |      |        |       |        |  |  |
| WBSCR28      | 7 | 73,275,488  | 73,280,223  |                                       |           |        |      |        |       |        |  |  |
| RFC2         | 7 | 73,149,547  | 73,668,738  |                                       |           |        |      |        |       |        |  |  |
| ELN          | 7 | 73,442,426  | 73,484,236  |                                       |           |        |      |        |       |        |  |  |
| LIMK1        | 7 | 73,498,106  | 73,536,855  |                                       |           |        |      |        |       |        |  |  |
| EIF4H        | 7 | 73,588,705  | 73,611,429  |                                       |           |        |      |        |       |        |  |  |
| LAT2         | 7 | 73,624,086  | 73,644,163  |                                       |           |        |      |        |       |        |  |  |
| LAT2         | 7 | 73,624,086  | 73,644,164  |                                       |           |        |      |        |       |        |  |  |
| CLIP2        | 7 | 73,703,804  | 73,820,273  |                                       |           |        |      |        |       |        |  |  |
| GTF2IRD1     | 7 | 73,868,119  | 74,016,920  |                                       |           |        |      |        |       |        |  |  |
| GTF2IRD1     | 7 | 73,920,321  | 74,016,918  |                                       |           |        |      |        |       |        |  |  |
| MIR4284      | 7 | 73,125,647  | 73,125,727  | chr7:72,490,276-73,992,274            | 1,501,998 | q11.23 | Gain | 47.059 | 0.002 | 3.33   |  |  |
| MIRS90       | 7 | 73,605,528  | 73,605,624  | (2 miRNAs)                            |           |        |      |        |       |        |  |  |
| GATS         | 7 | 99,798,277  | 99,869,855  | chr7:99,867,651-100,068,777           | 201,126   | q22.1  | Gain | 47.059 | 0.002 | 20.24  |  |  |
| GATS         | 7 | 99,798,278  | 99,869,855  | (10 genes)                            |           |        |      |        |       |        |  |  |
| SPDYE3       | 7 | 99,905,324  | 99,919,819  |                                       |           |        |      |        |       |        |  |  |
| PMS2P1       | 7 | 99,918,262  | 99,933,930  |                                       |           |        |      |        |       |        |  |  |
| PMS2P1       | 7 | 99,918,262  | 99,933,930  |                                       |           |        |      |        |       |        |  |  |
| PMS2P1       | 7 | 99,927,418  | 99,930,239  |                                       |           |        |      |        |       |        |  |  |
| PILRB        | 7 | 99,933,687  | 99,965,454  |                                       |           |        |      |        |       |        |  |  |
| PILRB        | 7 | 99,949,884  | 99,956,702  |                                       |           |        |      |        |       |        |  |  |
| PILRB        | 7 | 99,971,067  | 99,997,714  |                                       |           |        |      |        |       |        |  |  |
| PILRA        | 7 | 99,971,067  | 99,997,722  |                                       |           |        |      |        |       |        |  |  |
| ZCWPW1       | 7 | 99,998,495  | 100,007,167 |                                       |           |        |      |        |       |        |  |  |
| ZCWPW1       | 7 | 99,998,494  | 100,026,302 |                                       |           |        |      |        |       |        |  |  |
| ZCWPW1       | 7 | 100,016,355 | 100,026,302 |                                       |           |        |      |        |       |        |  |  |
| MEPCE        | 7 | 100,026,412 | 100,031,749 |                                       |           |        |      |        |       |        |  |  |
| PPP1R35      | 7 | 100,032,911 | 100,034,094 |                                       |           |        |      |        |       |        |  |  |
| C7orf61      | 7 | 100,054,237 | 100,061,894 |                                       |           |        |      |        |       |        |  |  |
| TSC22D4      | 7 | 100,064,141 | 100,076,902 |                                       |           |        |      |        |       |        |  |  |
| ADAM5P       | 8 | 39,172,181  | 39,260,375  | chr8:39,229,932-39,398,576            | 168,644   | p11.22 | Gain | 52.941 | 0     | 100.00 |  |  |
| ADAM3A       | 8 | 39,308,563  | 39,380,470  | (3 genes)                             |           |        |      |        |       |        |  |  |
| tMDC         | 8 | 39,308,564  | 39,380,470  |                                       |           |        |      |        |       |        |  |  |
| SLC39A4      | 8 | 145,635,776 | 145,642,273 | chr8:145,637,777-145,733,477          | 95,700    | q24.3  | Gain | 58.824 | 0     | 3.23   |  |  |
