# Supplementary material
Source: PubMed Central journal article supplement (PMC4030604)
Supplement: NIHMS481119-supplement-03.pdf [file NIHMS481119-supplement-03.pdf]

|    | A                                                                                                                               | B                            | C                          | D                      | E                                                                                                      | F                                                                                       |
|----|---------------------------------------------------------------------------------------------------------------------------------|------------------------------|----------------------------|------------------------|--------------------------------------------------------------------------------------------------------|-----------------------------------------------------------------------------------------|
| 1  | Supplemental Table 3. Genes involved in recurrent and non-recurrent homozygously deleted regions in MMT <sup>a</sup> cell lines |                              |                            |                        |                                                                                                        |                                                                                         |
| 2  |                                                                                                                                 |                              |                            |                        |                                                                                                        |                                                                                         |
| 3  | Chromosome                                                                                                                      | HD <sup>b</sup> region start | HD <sup>b</sup> region end | HD <sup>b</sup> length | Gene                                                                                                   | MMT <sup>a</sup> cell line                                                              |
| 4  | 1                                                                                                                               | 8,446,775                    | 8,601,272                  | 154,497                | <i>RERE</i>                                                                                            | H2869                                                                                   |
| 5  | 1                                                                                                                               | 19,400,997                   | 19,481,284                 | 80,287                 | <i>UBR4</i>                                                                                            | H28                                                                                     |
| 6  | 1                                                                                                                               | 49,709,776                   | 49,959,780                 | 250,004                | <i>AGBL4</i>                                                                                           | H2461                                                                                   |
| 7  | 1                                                                                                                               | 175,889,827                  | 175,995,229                | 105,402                | <i>RFWD2, SCARNA3</i>                                                                                  | H2052                                                                                   |
| 8  | 1                                                                                                                               | 214,548,704                  | 214,673,694                | 124,990                | <i>PTPN14</i>                                                                                          | H2591                                                                                   |
| 9  | 1                                                                                                                               | 227,108,696                  | 227,617,861                | 509,165                | <i>CABC1, CDC42BPA</i>                                                                                 | H2731                                                                                   |
| 10 | 1                                                                                                                               | 248,756,215                  | 248,785,503                | 29,288                 | <i>OR2T10</i>                                                                                          | H28                                                                                     |
| 11 | 2                                                                                                                               | 11,081,224                   | 11,323,121                 | 241,897                | <i>C2orf50, PQLC3, ROCK2</i>                                                                           | H2373                                                                                   |
| 12 | 3                                                                                                                               | 26,696,948                   | 27,385,689                 | 688,741                | <i>LRR3B, NEK10</i>                                                                                    | H290                                                                                    |
| 13 | 3                                                                                                                               | 41,258,032                   | 41,614,450                 | 356,418                | <i>CTNNB1, ULK4</i>                                                                                    | H28                                                                                     |
| 14 | 3                                                                                                                               | 52,028,981                   | 52,094,228                 | 65,247                 | <i>RPL29, DUSP7</i>                                                                                    | H2595,H2722                                                                             |
| 15 | 3                                                                                                                               | 52,094,228                   | 52,156,438                 | 62,210                 | <i>WDR51A</i>                                                                                          | H2595                                                                                   |
| 16 | 3                                                                                                                               | 52,452,536                   | 52,487,671                 | 35,135                 | <i>PHF7, SEMA3G, TNNC1</i>                                                                             | H2722                                                                                   |
| 17 | 3                                                                                                                               | 162,514,534                  | 162,619,082                | 104,548                |                                                                                                        | H2052,H2591,H2596,H28                                                                   |
| 18 | 4                                                                                                                               | 63,393,653                   | 63,495,855                 | 102,202                |                                                                                                        | H2810                                                                                   |
| 19 | 4                                                                                                                               | 69,375,140                   | 69,483,219                 | 108,079                | <i>UGT2B17, UGT2B29P</i>                                                                               | H290                                                                                    |
| 20 | 4                                                                                                                               | 70,182,118                   | 70,203,189                 | 21,071                 | <i>UGT2B28</i>                                                                                         | H2373                                                                                   |
| 21 | 4                                                                                                                               | 91,430,526                   | 91,662,411                 | 231,885                | <i>CCSER1/FAM190A</i>                                                                                  | H2461                                                                                   |
| 22 | 4                                                                                                                               | 91,662,411                   | 91,721,679                 | 59,268                 | <i>CCSER1/FAM190A</i>                                                                                  | H2691                                                                                   |
| 23 | 6                                                                                                                               | 32,487,424                   | 32,525,713                 | 38,289                 | <i>HLA-DRB5, HLA-DRB6</i>                                                                              | H2373                                                                                   |
| 24 | 7                                                                                                                               | 101,343,621                  | 101,840,204                | 496,583                | <i>CUX1</i>                                                                                            | H2691                                                                                   |
| 25 | 8                                                                                                                               | 39,237,438                   | 39,380,595                 | 143,157                | <i>ADAM5P, ADAM3A</i>                                                                                  | H2373,H2591,H2691                                                                       |
| 26 | 8                                                                                                                               | 113,347,502                  | 113,871,480                | 523,978                | <i>CSMD3, MIR2053</i>                                                                                  | H2461                                                                                   |
| 27 | 9                                                                                                                               | 9,453,833                    | 9,486,593                  | 32,760                 | <i>PTPRD</i>                                                                                           | H2691                                                                                   |
| 28 | 9                                                                                                                               | 19,873,894                   | 20,456,703                 | 582,809                | <i>MLL3</i>                                                                                            | H2373                                                                                   |
| 29 | 9                                                                                                                               | 20,456,703                   | 20,636,167                 | 179,464                | <i>MLL3</i>                                                                                            | H2373,H2591                                                                             |
| 30 | 9                                                                                                                               | 20,636,167                   | 20,704,720                 | 68,553                 | <i>KIAA1797</i>                                                                                        | H2373,H2591,H2596                                                                       |
| 31 | 9                                                                                                                               | 20,704,720                   | 20,874,659                 | 169,939                | <i>KIAA1797, MIR491</i>                                                                                | H2373,H2591,H2595,H2596                                                                 |
| 32 | 9                                                                                                                               | 20,874,659                   | 21,164,498                 | 289,839                | <i>KIAA1797, PTPAD2, IFN81, IFNW1</i>                                                                  | H2373,H2591,H2595,H2596,H2731                                                           |
| 33 | 9                                                                                                                               | 21,164,498                   | 21,289,842                 | 125,344                | <i>IFNA21, IFNA4, IFNA7, IFNA10, IFNA16, IFNA17, IFNA14, IFNWP15, IFNWP9, IFNWP18, IFNWP5, IFNA22P</i> | H2373,H2591,H2595,H2596,H2731,H2818                                                     |
| 34 | 9                                                                                                                               | 21,289,842                   | 21,363,140                 | 73,298                 | <i>IFNA5, KLHL9, IFNA6, IFNP20</i>                                                                     | H2373,H2591,H2595,H2596,H2722,H2731,H2810,H2818                                         |
| 35 | 9                                                                                                                               | 21,363,140                   | 21,743,410                 | 380,270                | <i>IFNA13, IFNA2, IFNA8, IFNA1, IFNE, IFNP11, IFNP12, IFNP2, IFNP19, MIR31</i>                         | H2373,H2591,H2595,H2596,H2722,H2731,H2795,H2810,H2818,H290                              |
| 36 | 9                                                                                                                               | 21,743,410                   | 21,837,873                 | 94,463                 | <i>MTAP</i>                                                                                            | H2052,H2373,H2591,H2595,H2596,H2722,H2731,H2795,H2810,H2818,H290                        |
| 37 | 9                                                                                                                               | 21,837,873                   | 21,883,639                 | 45,766                 | <i>MTAP</i>                                                                                            | H2052,H2369,H2373,H2461,H2591,H2595,H2596,H2722,H2731,H2795,H2810,H2818,H290,H513       |
| 38 | 9                                                                                                                               | 21,883,639                   | 21,967,548                 | 83,909                 | <i>C9orf53</i>                                                                                         | H2052,H2369,H2373,H2461,H2591,H2595,H2596,H2691,H2722,H2731,H2795,H2810,H2818,H290,H513 |
| 39 | 9                                                                                                                               | 21,967,548                   | 21,978,346                 | 10,798                 | <i>C9orf53, CDKN2A</i>                                                                                 | H2052,H2369,H2373,H2461,H2591,H2595,H2596,H2691,H2722,H2731,H2795,H2810,H2818,H290,H513 |
| 40 | 9                                                                                                                               | 21,978,346                   | 22,036,446                 | 58,100                 | <i>CDKN2A, CDKN2B, CDKN2B-AS, UBA52P6</i>                                                              | H2052,H2369,H2373,H2461,H2591,H2595,H2596,H2722,H2731,H2795,H2810,H2818,H2869,H290,H513 |
| 41 | 9                                                                                                                               | 22,036,446                   | 22,086,798                 | 50,352                 | <i>CDKN2BAS</i>                                                                                        | H2052,H2373,H2461,H2591,H2595,H2596,H2722,H2731,H2795,H2810,H2818,H2869,H290,H513       |
| 42 | 9                                                                                                                               | 22,086,798                   | 22,212,553                 | 125,755                | <i>CDKN2BAS</i>                                                                                        | H2052,H2373,H2591,H2595,H2596,H2722,H2731,H2795,H2810,H2818,H290                        |
| 43 | 9                                                                                                                               | 22,212,553                   | 22,382,290                 | 169,737                |                                                                                                        | H2052,H2373,H2591,H2595,H2596,H2722,H2731,H2795,H2810,H290                              |
| 44 | 9                                                                                                                               | 22,382,290                   | 23,803,345                 | 1,421,055              | <i>DMRTA1, ELAVL2</i>                                                                                  | H2052,H2373,H2591,H2595,H2596,H2722,H2795,H2810,H290                                    |
| 45 | 9                                                                                                                               | 23,803,345                   | 25,259,013                 | 1,455,668              | <i>ELAVL2, C9orf134/IZUMO3</i>                                                                         | H2052,H2373,H2595,H2596,H2722,H2795,H2810,H290                                          |
| 46 | 9                                                                                                                               | 25,259,013                   | 25,481,638                 | 222,625                |                                                                                                        | H2052,H2373,H2591,H2595,H2596,H2722,H2795,H2810,H290                                    |
| 47 | 9                                                                                                                               | 25,481,638                   | 26,600,444                 | 1,118,806              | <i>TUSC1</i>                                                                                           | H2052,H2373,H2591,H2595,H2596,H2722,H2795,H290                                          |
| 48 | 9                                                                                                                               | 26,600,444                   | 27,263,839                 | 663,395                | <i>C9orf82/CAAP1, PLAA, IFT74, LRR19, TEK, NCRNA00032</i>                                              | H2052,H2373,H2595,H2596,H2722,H2795,H290                                                |
| 49 | 9                                                                                                                               | 27,263,839                   | 28,126,628                 | 862,789                | <i>C9orf11/EQTN, MOBKL2B, C9orf35/MOB3B, IFNK, C9orf72, NCRNA00032/LINC00032, LINGO2</i>               | H2052,H2595,H2596,H2722,H2795,H290                                                      |
| 50 | 9                                                                                                                               | 28,126,628                   | 28,226,376                 | 99,748                 | <i>LINGO2</i>                                                                                          | H2052,H2595,H2722,H2795,H290                                                            |
| 51 | 9                                                                                                                               | 28,226,376                   | 28,275,489                 | 49,113                 | <i>LINGO2</i>                                                                                          | H2595,H2722,H2795,H290                                                                  |
| 52 | 9                                                                                                                               | 28,275,489                   | 28,320,731                 | 45,242                 | <i>LINGO2</i>                                                                                          | H2595,H2722,H2795,H28,H290                                                              |
| 53 | 9                                                                                                                               | 28,320,731                   | 28,398,919                 | 78,188                 | <i>LINGO2</i>                                                                                          | H2595,H2596,H2722,H2795,H28,H290                                                        |
| 54 | 9                                                                                                                               | 28,398,919                   | 28,418,992                 | 20,073                 | <i>LINGO2</i>                                                                                          | H2595,H2722,H28,H290                                                                    |
| 55 | 9                                                                                                                               | 28,418,992                   | 28,546,934                 | 127,942                | <i>LINGO2</i>                                                                                          | H2595,H2722,H290                                                                        |
| 56 | 9                                                                                                                               | 28,546,934                   | 28,634,165                 | 87,231                 | <i>LINGO2</i>                                                                                          | H2595,H2596,H2722,H290                                                                  |
| 57 | 9                                                                                                                               | 28,634,165                   | 29,165,476                 | 531,311                | <i>LINGO2, MIR876, MIR873</i>                                                                          | H2595,H2722,H290                                                                        |
| 58 | 9                                                                                                                               | 29,165,476                   | 30,747,580                 | 1,582,104              |                                                                                                        | H2595,H290                                                                              |
| 59 | 9                                                                                                                               | 30,747,580                   | 31,367,313                 | 619,733                | <i>KRT18P36, RPS26P2</i>                                                                               | H2595                                                                                   |
| 60 | 9                                                                                                                               | 103,156,805                  | 103,206,418                | 49,613                 | <i>C9orf30, TMEFF1</i>                                                                                 | H2818                                                                                   |
| 61 | 11                                                                                                                              | 68,249,139                   | 68,305,248                 | 56,109                 | <i>SAPS3</i>                                                                                           | H2369                                                                                   |
| 62 | 11                                                                                                                              | 80,024,453                   | 80,181,112                 | 156,659                |                                                                                                        | H2461                                                                                   |
| 63 | 11                                                                                                                              | 100,211,247                  | 100,227,368                | 16,121                 | <i>CNTN5</i>                                                                                           | H2596                                                                                   |
| 64 | 12                                                                                                                              | 10,572,751                   | 10,593,689                 | 20,938                 | <i>KLRC3, KLRC2</i>                                                                                    | H2373                                                                                   |
| 65 | 12                                                                                                                              | 14,656,740                   | 14,774,931                 | 118,191                | <i>PLBD1, GUCY2C</i>                                                                                   | H290                                                                                    |
| 66 | 13                                                                                                                              | 21,548,669                   | 21,561,423                 | 12,754                 | <i>LATS2</i>                                                                                           | H2373                                                                                   |
| 67 | 13                                                                                                                              | 21,561,423                   | 21,581,351                 | 19,928                 | <i>LATS2</i>                                                                                           | H2052,H2373                                                                             |
| 68 | 13                                                                                                                              | 21,581,351                   | 21,620,150                 | 38,799                 | <i>LATS2</i>                                                                                           | H2052                                                                                   |
| 69 | 13                                                                                                                              | 94,798,738                   | 94,875,200                 | 76,462                 | <i>GPC6</i>                                                                                            | H2461                                                                                   |
| 70 | 14                                                                                                                              | 40,733,870                   | 40,960,013                 | 226,143                |                                                                                                        | H2052                                                                                   |
| 71 | 14                                                                                                                              | 45,765,800                   | 45,896,018                 | 130,218                |                                                                                                        | H2461                                                                                   |

|     | A                                                                                              | B           | C           | D       | E                            | F                              |
|-----|------------------------------------------------------------------------------------------------|-------------|-------------|---------|------------------------------|--------------------------------|
| 72  | 14                                                                                             | 74,080,540  | 74,102,518  | 21,978  | ACOT6                        | H2818                          |
| 73  | 14                                                                                             | 79,141,138  | 79,170,431  | 29,293  | NRXN3                        | H2369                          |
| 74  | 14                                                                                             | 79,187,922  | 79,268,086  | 80,164  | NRXN3                        | H2369                          |
| 75  | 14                                                                                             | 106,891,260 | 106,906,901 | 15,641  | IGHV1-40-1, IGHV3-41         | H2052                          |
| 76  | 16                                                                                             | 6,266,578   | 6,282,712   | 16,134  |                              | H2373                          |
| 77  | 16                                                                                             | 6,282,712   | 6,371,455   | 88,743  | RBFOX1/A2BP1                 | H2369,H2373                    |
| 78  | 16                                                                                             | 6,371,455   | 6,525,834   | 154,379 | RBFOX1/A2BP1                 | H2369,H2373,H2691              |
| 79  | 16                                                                                             | 6,525,834   | 6,610,962   | 85,128  | RBFOX1/A2BP1                 | H2052,H2369,H2373,H2691,H2869  |
| 80  | 16                                                                                             | 6,610,962   | 6,628,137   | 17,175  | RBFOX1/A2BP1                 | H2052,H2373,H2691,H2869        |
| 81  | 16                                                                                             | 6,628,137   | 6,650,736   | 22,599  | RBFOX1/A2BP1                 | H2052,H2373,H2869              |
| 82  | 16                                                                                             | 6,650,736   | 6,754,986   | 104,250 | RBFOX1/A2BP1                 | H2052,H2373,H2691,H2869        |
| 83  | 16                                                                                             | 6,754,986   | 6,785,607   | 30,621  | RBFOX1/A2BP1                 | H2052,H2691,H2869              |
| 84  | 16                                                                                             | 6,785,607   | 6,836,910   | 51,303  | RBFOX1/A2BP1                 | H2052,H2373,H2591,H2691,H2869  |
| 85  | 16                                                                                             | 6,836,910   | 6,889,408   | 52,498  | RBFOX1/A2BP1                 | H2373,H2869                    |
| 86  | 16                                                                                             | 6,889,408   | 6,998,726   | 109,318 | RBFOX1/A2BP1                 | H2373,H2461,H2869              |
| 87  | 16                                                                                             | 6,998,726   | 7,180,401   | 181,675 | RBFOX1/A2BP1                 | H2373,H2461                    |
| 88  | 16                                                                                             | 7,180,401   | 7,203,207   | 22,806  |                              | H2461                          |
| 89  | 19                                                                                             | 1,191,934   | 1,211,640   | 19,706  | STK11                        | H2369                          |
| 90  | 19                                                                                             | 38,229,263  | 38,631,356  | 402,093 | ZNF573, WDR87, SIPA1L3       | H2369                          |
| 91  | 20                                                                                             | 14,824,372  | 15,055,853  | 231,481 | MACROD2, NCRNA00186          | H2691                          |
| 92  | 22                                                                                             | 24,371,205  | 24,382,211  | 11,006  | GSTT1                        | H2691,H2722,H2810, H2869,H513, |
| 93  | 22                                                                                             | 29,971,170  | 30,035,085  | 63,915  | NIPSNAP1, NF2                | H2591                          |
| 94  | 22                                                                                             | 30,035,085  | 30,074,260  | 39,175  | NF2                          | H2369,H2461                    |
| 95  | 22                                                                                             | 30,074,260  | 30,092,388  | 18,128  | NF2                          | H2052,H2369                    |
| 96  | 22                                                                                             | 30,092,388  | 30,109,502  | 17,114  | NF2                          | H2052                          |
| 97  | 22                                                                                             | 32,138,114  | 32,229,881  | 91,767  | C22orf30, DEPDC5             | H2369                          |
| 98  | 22                                                                                             | 39,372,343  | 39,385,439  | 13,096  | APOBEC3B, APOBEC3D, APOBEC3C | H2596                          |
| 99  |                                                                                                |             |             |         |                              |                                |
| 100 | Malignant mesothelioma.                                                                        |             |             |         |                              |                                |
| 101 | Homozygous deletion.                                                                           |             |             |         |                              |                                |
| 102 | Highlighted in yellow are homozygous deletions present in at least 2 of the 17 MMT cell lines. |             |             |         |                              |                                |
| 103 |                                                                                                |             |             |         |                              |                                |
