# Supplementary material
Source: PubMed Central journal article supplement (PMC4030604)
Supplement: NIHMS481119-supplement-04.pdf [file NIHMS481119-supplement-04.pdf]

| Supplemental Table 4. Homozygous deletion characterization per malignant mesothelioma cell line |            |                        |                      |                         |                              | No- recurrent | Recurrent | Total      |
|-------------------------------------------------------------------------------------------------|------------|------------------------|----------------------|-------------------------|------------------------------|---------------|-----------|------------|
| Cell line                                                                                       | Chr        | mcd <sup>r</sup> start | mcd <sup>r</sup> end | mcd <sup>r</sup> length | Gene                         | HD            | HD        | No. of HDs |
| H2052                                                                                           | 1          | 175,889,827            | 175,995,229          | 105,402                 | RFWD2, SCARNA3               | X             |           |            |
|                                                                                                 | 3          | 162,514,534            | 162,619,082          | 104,548                 | No known genes               |               | X         |            |
|                                                                                                 | 9          | 21,743,410             | 28,226,376           | 6,482,966               | MTAP to LINGO2               |               | X         |            |
|                                                                                                 | 13         | 21,561,423             | 21,620,150           | 58,727                  | LATS2                        |               | X         |            |
|                                                                                                 | 14         | 40,733,870             | 40,960,013           | 226,143                 | No known genes               | X             |           |            |
|                                                                                                 | 14         | 106,891,260            | 106,906,901          | 15,641                  | IGHV1-40-1, IGHV3-41         | X             |           |            |
|                                                                                                 | 16         | 6,525,834              | 6,836,910            | 311,076                 | RBFOX1/A2BP1                 |               | X         |            |
|                                                                                                 | 22         | 30,074,260             | 30,109,502           | 35,242                  | NF2                          |               | X         |            |
|                                                                                                 |            |                        |                      |                         | 3                            | 5             | 8         |            |
| H2369                                                                                           | 9          | 21,837,873             | 22,036,446           | 198,573                 | MTAP to CDKN2BAS             |               | X         |            |
|                                                                                                 | 11         | 68,249,139             | 68,305,248           | 56,109                  | SAPS3                        | X             |           |            |
|                                                                                                 | 14         | 79,141,138             | 79,170,431           | 29,293                  | NRXN3                        | X             |           |            |
|                                                                                                 | 14         | 79,187,922             | 79,268,086           | 80,164                  | NRXN3                        | X             |           |            |
|                                                                                                 | 16         | 6,282,712              | 6,610,962            | 328,250                 | RBFOX1/A2BP1                 |               | X         |            |
|                                                                                                 | 19         | 1,191,934              | 1,211,640            | 19,706                  | STK11                        | X             |           |            |
|                                                                                                 | 19         | 38,229,263             | 38,631,356           | 402,093                 | ZNF573 to SIPA1L3            | X             |           |            |
|                                                                                                 | 22         | 30,035,085             | 30,092,388           | 57,303                  | NF2                          |               | X         |            |
| 22                                                                                              | 32,138,114 | 32,229,881             | 91,767               | C22orf30, DEPDC5        | X                            |               |           |            |
|                                                                                                 |            |                        |                      |                         | 6                            | 3             | 9         |            |
| H2373                                                                                           | 2          | 11,081,224             | 11,323,121           | 241,897                 | C2orf50 to ROCK2             | X             |           |            |
|                                                                                                 | 4          | 70,182,118             | 70,203,189           | 21,071                  | UGT2B28                      | X             |           |            |
|                                                                                                 | 6          | 32,487,424             | 32,525,713           | 38,289                  | HLA-DRB5, HLA-DRB6           | X             |           |            |
|                                                                                                 | 8          | 39,237,438             | 39,380,595           | 143,157                 | ADAM5P, ADAM3A               |               | X         |            |
|                                                                                                 | 9          | 19,873,894             | 27,263,839           | 7,389,945               | MLLT3 to NCRNA00032          |               | X         |            |
|                                                                                                 | 12         | 10,572,751             | 10,593,689           | 20,938                  | KLRC3, KLRC2                 | X             |           |            |
|                                                                                                 | 13         | 21,548,669             | 21,581,351           | 32,682                  | LATS2                        |               | X         |            |
|                                                                                                 | 16         | 6,266,578              | 6,754,986            | 488,408                 | RBFOX1/A2BP1                 |               | X         |            |
| 16                                                                                              | 6,785,607  | 7,180,401              | 394,794              | RBFOX1/A2BP1            |                              | X             |           |            |
|                                                                                                 |            |                        |                      |                         | 4                            | 5             | 9         |            |
| H2461                                                                                           | 1          | 49,709,776             | 49,959,780           | 250,004                 | AGBL4                        | X             |           |            |
|                                                                                                 | 4          | 91,430,526             | 91,662,411           | 231,885                 | CCSER1/FAM190A               |               | X         |            |
|                                                                                                 | 8          | 113,347,502            | 113,871,480          | 523,978                 | CSMD3, MIR2053               | X             |           |            |
|                                                                                                 | 9          | 21,837,873             | 22,086,798           | 248,925                 | MTAP to CDKN2BAS             |               | X         |            |
|                                                                                                 | 11         | 80,024,453             | 80,181,112           | 156,659                 | No known genes               | X             |           |            |
|                                                                                                 | 13         | 94,798,738             | 94,875,200           | 76,462                  | GPC6                         | X             |           |            |
|                                                                                                 | 14         | 45,765,800             | 45,896,018           | 130,218                 | No known genes               | X             |           |            |
|                                                                                                 | 16         | 6,889,408              | 7,203,207            | 313,799                 | RBFOX1/A2BP1                 |               | X         |            |
| 22                                                                                              | 30,035,085 | 30,074,260             | 39,175               | NF2                     |                              | X             |           |            |
|                                                                                                 |            |                        |                      |                         | 5                            | 4             | 9         |            |
| H2591                                                                                           | 1          | 214,548,704            | 214,673,694          | 124,990                 | PTPN14                       | X             |           |            |
|                                                                                                 | 3          | 162,514,534            | 162,619,082          | 104,548                 | No known genes               |               | X         |            |
|                                                                                                 | 8          | 39,237,438             | 39,380,595           | 143,157                 | ADAM5P, ADAM3A               |               | X         |            |
|                                                                                                 | 9          | 20,456,703             | 23,803,345           | 3,346,642               | MLLT3 to ELAVL2              |               | X         |            |
|                                                                                                 | 9          | 25,259,013             | 26,600,444           | 1,341,431               | TUSC1                        |               | X         |            |
|                                                                                                 | 16         | 6,785,607              | 6,836,910            | 51,303                  | RBFOX1/A2BP1                 |               | X         |            |
|                                                                                                 | 22         | 29,971,170             | 30,035,085           | 63,915                  | NIPSNAP1, NF2                |               | X         |            |
|                                                                                                 |            |                        |                      |                         | 1                            | 6             | 7         |            |
| H2595                                                                                           | 3          | 52,028,981             | 52,156,438           | 127,457                 | RPL29 to WDR51A              |               | x         |            |
|                                                                                                 | 9          | 20,704,720             | 31,367,313           | 10,662,593              | KIAA1797 to RPS26P2          |               | x         |            |
|                                                                                                 |            |                        |                      |                         |                              |               | 2         | 2          |
| H2596                                                                                           | 3          | 162,514,534            | 162,619,082          | 104,548                 | No known genes               |               | X         |            |
|                                                                                                 | 9          | 20,636,167             | 28,126,628           | 7,490,461               | KIAA1797 to LINGO2           |               | X         |            |
|                                                                                                 | 9          | 28,320,731             | 28,398,919           | 78,188                  | LINGO2                       |               | X         |            |
|                                                                                                 | 9          | 28,546,934             | 28,634,165           | 87,231                  | LINGO2                       |               | X         |            |
|                                                                                                 | 11         | 100,211,247            | 100,227,368          | 16,121                  | CNTN5                        | X             |           |            |
|                                                                                                 | 22         | 39,372,343             | 39,385,439           | 13,096                  | APOBEC3B, APOBEC3D, APOBEC3C | X             |           |            |
|                                                                                                 |            |                        |                      |                         | 2                            | 4             | 6         |            |

|                                                          |    |             |             |           |                      |              |  |    |    |
|----------------------------------------------------------|----|-------------|-------------|-----------|----------------------|--------------|--|----|----|
| <b>H2691</b>                                             | 4  | 91,662,411  | 91,721,679  | 59,268    | CCSER1/FAM190A       |              |  | X  |    |
|                                                          | 7  | 101,343,621 | 101,840,204 | 496,583   | CUX1                 | X            |  |    |    |
|                                                          | 8  | 39,237,438  | 39,380,595  | 143,157   | ADAM5P, ADAM3A       |              |  | X  |    |
|                                                          | 9  | 9,453,833   | 9,486,593   | 32,760    | PTPRD                | X            |  |    |    |
|                                                          | 9  | 21,883,639  | 21,978,346  | 94,707    | C9orf53, CDKN2A      |              |  | X  |    |
|                                                          | 16 | 6,371,455   | 6,628,137   | 256,682   | RBFOX1/A2BP1         |              |  | X  |    |
|                                                          | 16 | 6,650,736   | 6,836,910   | 186,174   | RBFOX1/A2BP1         |              |  | X  |    |
|                                                          | 20 | 14,824,372  | 15,055,853  | 231,481   | MACROD2, NCRNA00186  | X            |  |    |    |
|                                                          | 22 | 24,371,205  | 24,382,211  | 11,006    | GSTT1                |              |  | X  |    |
|                                                          |    |             |             |           |                      | 3            |  | 6  | 9  |
| <b>H2722</b>                                             | 3  | 52,028,981  | 52,094,228  | 65,247    | RPL29, DUSP7         |              |  | X  |    |
|                                                          | 3  | 52,452,536  | 52,487,671  | 35,135    | PHF7 to TNNC1        | X            |  |    |    |
|                                                          | 9  | 21,289,842  | 29,165,476  | 7,875,634 | IFNA5 to MIR873      |              |  | X  |    |
|                                                          | 22 | 24,371,205  | 24,382,211  | 11,006    | GSTT1                |              |  | X  |    |
|                                                          |    |             |             |           |                      | 1            |  | 3  | 4  |
| <b>H2731</b>                                             | 1  | 227,108,696 | 227,617,861 | 509,165   | CABC1, CDC42BP4      | X            |  |    |    |
|                                                          | 9  | 20,874,659  | 22,382,290  | 1,507,631 | KIAA1797 to CDKN2BAS |              |  | X  |    |
|                                                          |    |             |             |           |                      | 1            |  | 1  | 2  |
| <b>H2795</b>                                             | 9  | 21,363,140  | 28,398,919  | 7,035,779 | IFNA13 to LINGO2     |              |  | X  |    |
|                                                          |    |             |             |           |                      | 0            |  | 1  | 1  |
| <b>H28</b>                                               | 1  | 19,400,997  | 19,481,284  | 80,287    | UBR4                 | X            |  |    |    |
|                                                          | 1  | 248,756,215 | 248,785,503 | 29,288    | OR2T10               | X            |  |    |    |
|                                                          | 3  | 41,258,032  | 41,614,450  | 356,418   | CTNNB1, ULK4         | X            |  |    |    |
|                                                          | 3  | 162,514,534 | 162,619,082 | 104,548   | No known genes       |              |  | X  |    |
|                                                          | 9  | 21,967,548  | 22,036,446  | 68,898    | C9orf53 to UBA52P6   |              |  | X  |    |
|                                                          | 9  | 28,275,489  | 28,418,992  | 143,503   | LINGO2               |              |  | X  |    |
|                                                          |    |             |             |           |                      | 3            |  | 3  | 6  |
| <b>H2810</b>                                             | 4  | 63,393,653  | 63,495,855  | 102,202   | No known genes       | X            |  |    |    |
|                                                          | 9  | 21,289,842  | 25,481,638  | 4,191,796 | IFNA5 to C9orf134    |              |  | X  |    |
|                                                          | 22 | 24,371,205  | 24,382,211  | 11,006    | GSTT1                |              |  | X  |    |
|                                                          |    |             |             |           |                      | 1            |  | 2  | 3  |
| <b>H2818</b>                                             | 9  | 21,164,498  | 22,212,553  | 1,048,055 | IFNA21 to CDKN2BAS   |              |  | X  |    |
|                                                          | 9  | 103,156,805 | 103,206,418 | 49,613    | C9orf30, TMEFF1      | X            |  |    |    |
|                                                          | 14 | 74,080,540  | 74,102,518  | 21,978    | ACOT6                | X            |  |    |    |
|                                                          |    |             |             |           |                      | 2            |  | 1  | 3  |
| <b>H2869</b>                                             | 1  | 8,446,775   | 8,601,272   | 154,497   | RERE                 | X            |  |    |    |
|                                                          | 9  | 21,978,346  | 22,086,798  | 108,452   | CDKN2A to CDKN2B-AS  |              |  | X  |    |
|                                                          | 16 | 6,525,834   | 6,998,726   | 472,892   | RBFOX1/A2BP1         |              |  | X  |    |
|                                                          | 22 | 24,371,205  | 24,382,211  | 11,006    | GSTT1                |              |  | X  |    |
|                                                          |    |             |             |           |                      | 1            |  | 3  | 4  |
| <b>H290</b>                                              | 3  | 26,696,948  | 27,385,689  | 688,741   | LRRC3B, NEK10        | X            |  |    |    |
|                                                          | 4  | 69,375,140  | 69,483,219  | 108,079   | UGT2B17, UGT2B29P    | X            |  |    |    |
|                                                          | 9  | 21,363,140  | 30,747,580  | 9,384,440 | IFNA13 to MIR873     |              |  | X  |    |
|                                                          | 12 | 14,656,740  | 14,774,931  | 118,191   | PLBD1, GUCY2C        | X            |  |    |    |
|                                                          |    |             |             |           |                      | 3            |  | 1  | 4  |
| <b>H513</b>                                              | 9  | 21,837,873  | 22,036,446  | 198,573   | MTAP to UBA52P6      |              |  | X  |    |
|                                                          | 22 | 24,371,205  | 24,382,211  | 11,006    | GSTT1                |              |  | X  |    |
|                                                          |    |             |             |           |                      | 0            |  | 2  | 2  |
|                                                          |    |             |             |           |                      | <i>Total</i> |  | 36 | 52 |
|                                                          |    |             |             |           |                      |              |  |    | 88 |
| a mcd: minimal common deleted region                     |    |             |             |           |                      |              |  |    |    |
| Highlighted areas are meant to distinguish different HDs |    |             |             |           |                      |              |  |    |    |
