# Supplementary material
Source: PubMed Central journal article supplement (PMC4030604)

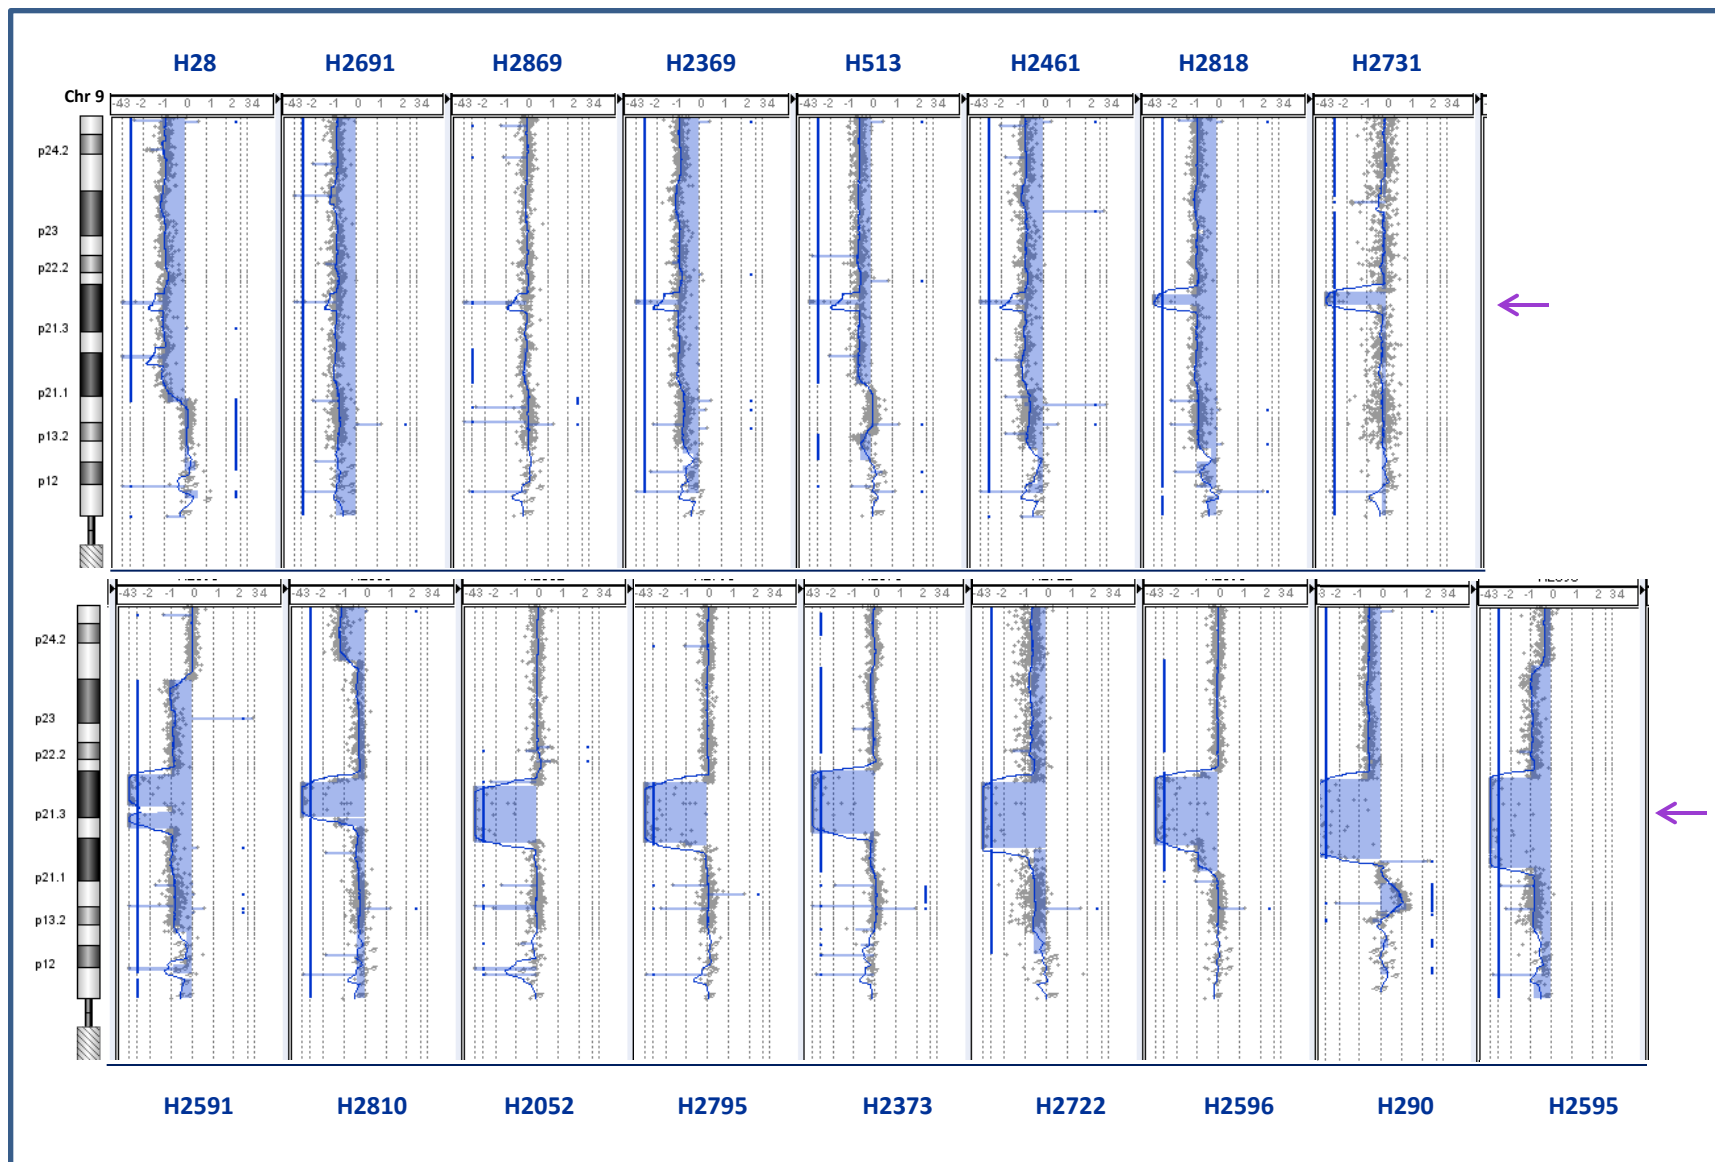

Supplemental Figure 1

Supplement: NIHMS481119-supplement-05.pdf [file NIHMS481119-supplement-05.pdf]
